# Supplementary material for: Cocrystallization of multi-kinase inhibitor pazopanib with fenamic acids: improving dissolution and inhibiting cell migration
Source: Royal Society of Chemistry journal article supplement (doi:10.1039/d3ce00773a), 2023-01-01
Supplement: d3ce00773a1.pdf [file d3ce00773a1.pdf]

## Electronic Supplementary Information (ESI)†

### **Cocrystallization of multi-kinase inhibitor pazopanib with fenamic acids: Improving dissolution and inhibiting cell migration**

Sunil K. Rai,<sup>\*ac</sup> Anilkumar Gunnam,<sup>b</sup> Debopriya Roy,<sup>de</sup> Raveena Rajput,<sup>d</sup> Kiran Kulkarni<sup>de</sup>  
and Ashwini K. Nangia<sup>\*bc</sup>

<sup>a</sup>Department of Chemistry, Faculty of Science, University of Lucknow, Lucknow, Uttar Pradesh 226007, India

<sup>b</sup>School of Chemistry, University of Hyderabad, Prof. C. R. Rao Road, Gachibowli, Central University P.O., Hyderabad 500 046, India

<sup>c</sup>Division of Organic Chemistry, CSIR – National Chemical Laboratory, Dr. Homi Bhabha Road, Pune 411008, India

<sup>d</sup>Biochemical Sciences Division, CSIR-National Chemical Laboratory, Dr. Homi Bhabha Road, Pune-411008

<sup>e</sup>Academy of Scientific and Innovative Research (AcSIR), New Delhi-110025, India

Email: [sunilbhu28@gmail.com](mailto:sunilbhu28@gmail.com), [ashwini.nangia@gmail.com](mailto:ashwini.nangia@gmail.com)

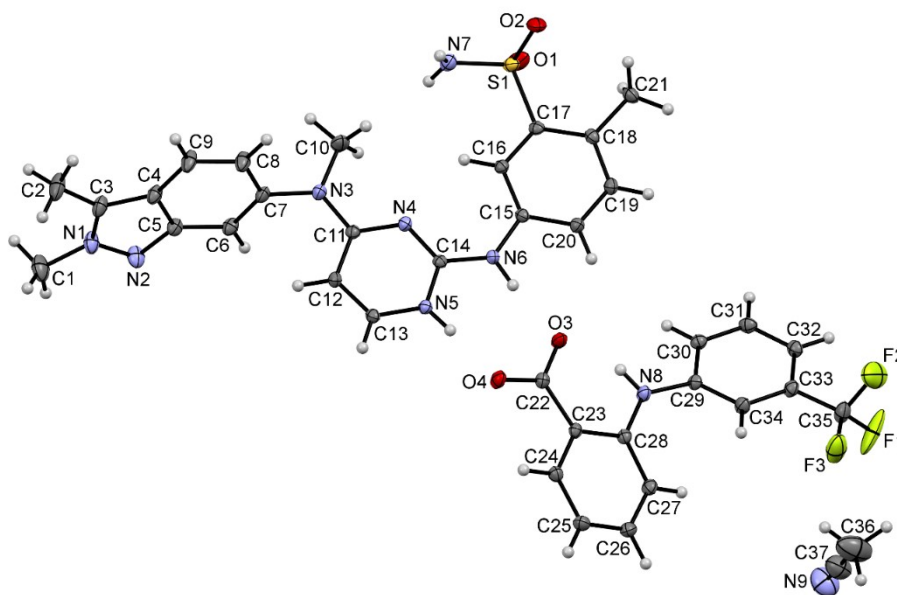

**Fig. S1.** ORTEP diagram of PAZ<sup>+</sup>·FFA<sup>-</sup>·ACN form I. Thermal ellipsoids are drawn at 50% probability level.

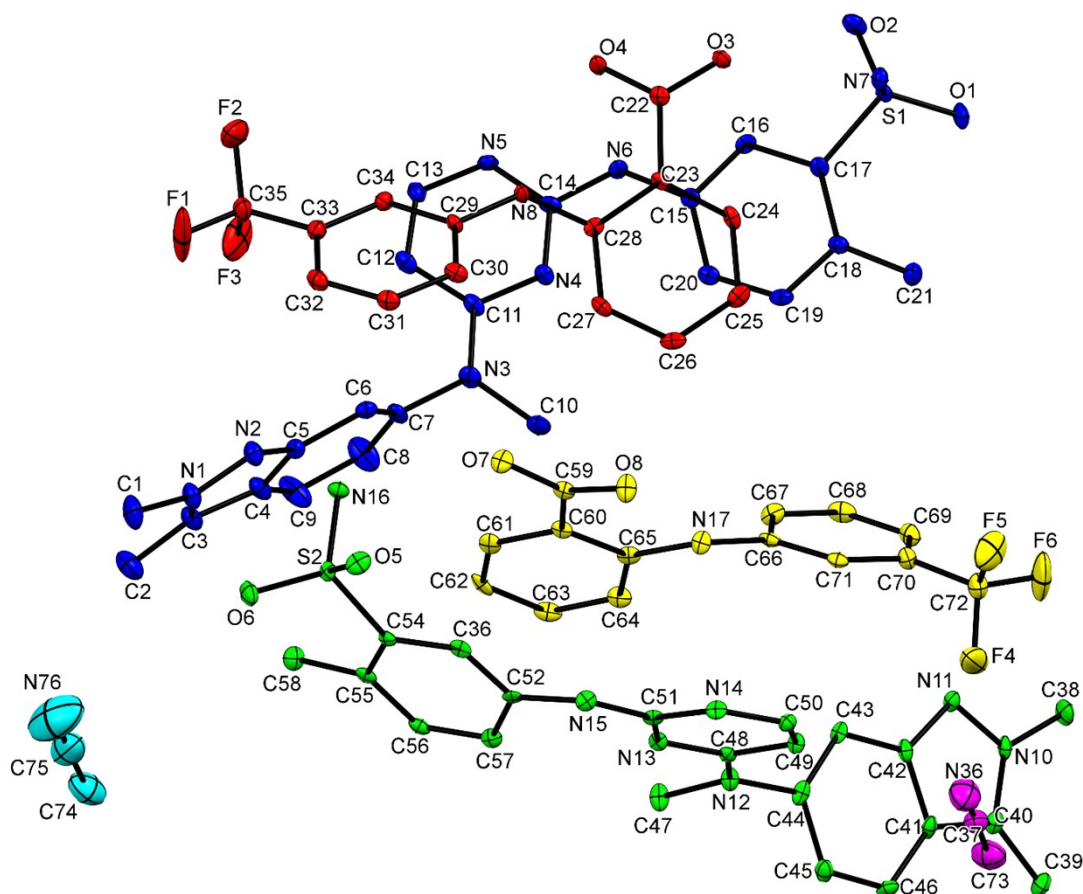

**Fig. S2.** ORTEP diagram of PAZ<sup>+</sup>·FFA<sup>-</sup>·ACN form II. Thermal ellipsoids are drawn at 50% probability level. Hydrogen atoms are omitted for clarity of the picture and molecular colors are shown by symmetry equivalence.

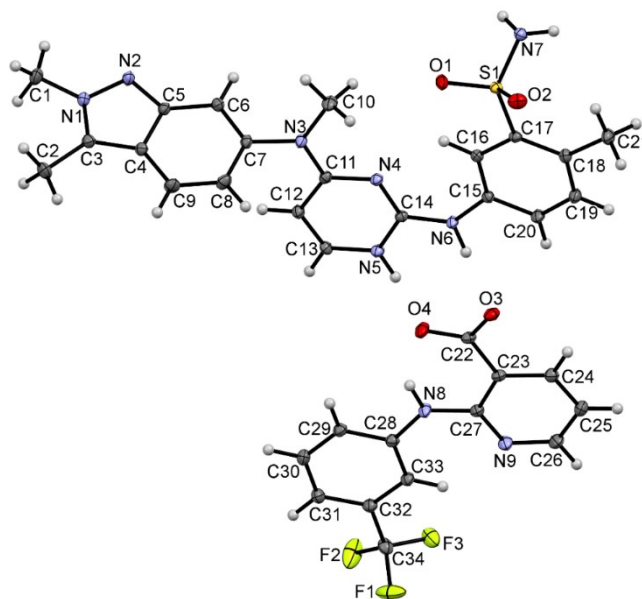

**Fig. S3.** ORTEP diagram of  $\text{PAZ}^+\cdot\text{NFA}^-$ . Thermal ellipsoids are drawn at 50% probability level.

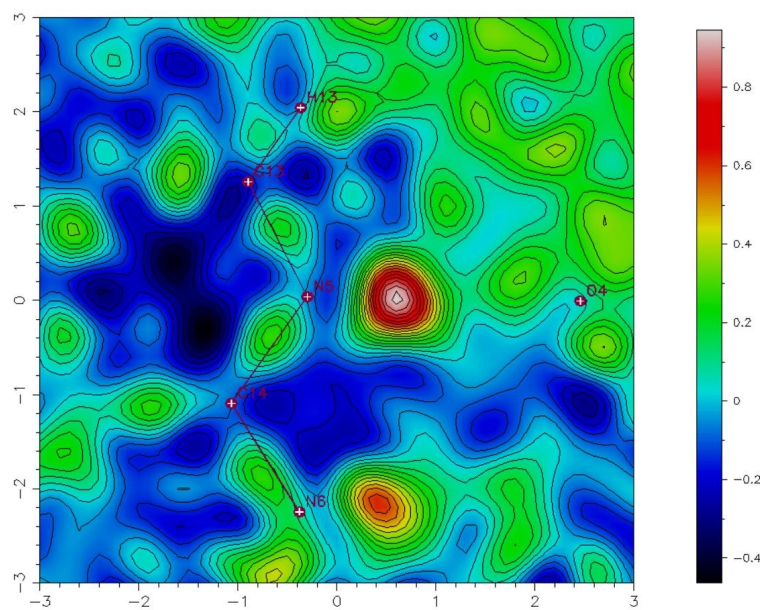

**Fig. S4.** Fourier difference maps for  $\text{PAZ}^+\cdot\text{FFA}^-\cdot\text{ACN}$  form I showing the electron density in heterodimer '2-aminopyrimidine and  $-\text{COOH}$ ' with the hydrogen atoms in the linking hydrogen bonds omitted from the models. For atom numbering see ORTEP diagram.

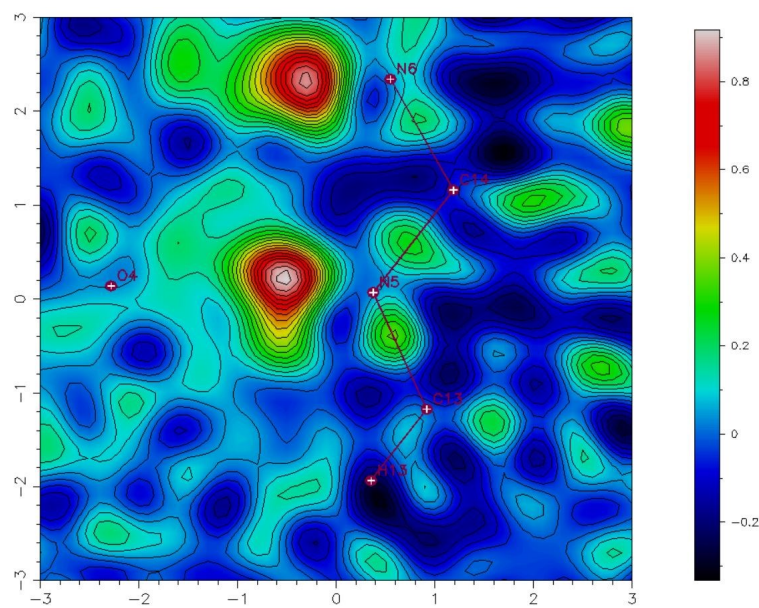

**Fig. S5.** Fourier difference maps for  $\text{PAZ}^+\cdot\text{NFA}^-$  showing the electron density in heterodimer ‘2-aminopyrimidine and  $-\text{COOH}$ ’ with the hydrogen atoms in the linking hydrogen bonds omitted from the models. For atom numbering see ORTEP diagram.

**Table S1.** Geometrical Parameters of Potential Intra- and Intermolecular Interactions in  $\text{PAZ}^+\cdot\text{FFA}^-\cdot\text{ACN}$  form I and II and  $\text{PAZ}^+\cdot\text{NFA}^-$ .

| D–H···A       | H···A (Å) | D···A (Å)                                       | D–H···A (deg) | symmetry code |
|---------------|-----------|-------------------------------------------------|---------------|---------------|
|               |           | <b>PAZ<sup>+</sup>•FFA<sup>-</sup>•ACN (I)</b>  |               |               |
| N5–H5···O4    | 1.92      | 2.7601(1)                                       | 175           | 1-x,-y,1-z    |
| N6–H6···O3    | 1.85      | 2.7373(1)                                       | 175           | 1-x,-y,1-z    |
| N7–H7A···N9   | 2.16      | 2.9938(1)                                       | 163           | 1-x,1-y,-z    |
| N7–H7B···O4   | 1.97      | 2.8457(1)                                       | 173           | x,1+y,z       |
| N8–H8A···O3   | 1.82      | 2.5967(1)                                       | 149           | Intra         |
| C13–H13···O2  | 2.48      | 3.0338(1)                                       | 117           | -1+x,y,z      |
| C16–H16···N4  | 2.36      | 2.9546(1)                                       | 121           | Intra         |
| C16–H16···N7  | 2.57      | 3.0054(1)                                       | 108           | Intra         |
| C20–H20···O3  | 2.45      | 3.2178(1)                                       | 138           | 1-x,-y,1-z    |
| C21–H21C···O2 | 2.51      | 3.0762(1)                                       | 117           | Intra         |
| C24–H24···O4  | 2.43      | 2.7648(1)                                       | 101           | Intra         |
|               |           | <b>PAZ<sup>+</sup>•FFA<sup>-</sup>•ACN (II)</b> |               |               |
| N5–H5···O3    | 1.82      | 2.674(3)                                        | 176           | 2-x,1-y,1-z   |
| N6–H6···O4    | 1.93      | 2.771(3)                                        | 167           | 2-x,1-y,1-z   |
| N7–H7A···N11  | 2.39      | 3.130(3)                                        | 158           | 1+x,y,z       |
| N7–H7B···O3   | 1.83      | 2.847(3)                                        | 168           | x,y,z         |
| N8–H8A···O4   | 2.07      | 2.676(3)                                        | 127           | Intra         |
| N14–H14···O7  | 1.64      | 2.684(3)                                        | 173           | 1-x,1-y,-z    |

|                |      |                                        |     |                   |
|----------------|------|----------------------------------------|-----|-------------------|
| N15-H15...O8   | 1.96 | 2.795(3)                               | 165 | 1-x,1-y,-z        |
| N16-H16A...O7  | 1.91 | 2.901(3)                               | 169 | x,y,z             |
| N16-H16B...N2  | 2.24 | 3.039(3)                               | 171 | x,y,z             |
| N17-H17...O8   | 2.06 | 2.690(3)                               | 130 | Intra             |
| C1-H1C...O1    | 2.47 | 3.226(4)                               | 136 | x,-1+y,z          |
| C10-H10C...N4  | 2.29 | 2.741(3)                               | 108 | Intra             |
| C16-H16...O2   | 2.38 | 2.826(3)                               | 108 | Intra             |
| C20-H20...N4   | 2.37 | 2.879(3)                               | 115 | Intra             |
| C21-H21A...O1  | 2.53 | 2.950(3)                               | 107 | Intra             |
| C24-H24...O3   | 2.45 | 2.784(3)                               | 101 | Intra             |
| C34-H34...O2   | 2.50 | 3.411(4)                               | 168 | 2-x,1-y,1-z       |
| C36-H36...O5   | 2.40 | 2.813(3)                               | 107 | Intra             |
| C38-H38B...O6  | 2.44 | 3.359(4)                               | 160 | -1+x,1+y,z        |
| C39-H39C...F5  | 2.52 | 3.286(4)                               | 137 | -x,2-y,-z         |
| C47-H47A...N13 | 2.27 | 2.728(3)                               | 108 | Intra             |
| C57-H57...N13  | 2.40 | 2.907(3)                               | 114 | Intra             |
| C58-H58A...O6  | 2.40 | 2.999(3)                               | 121 | Intra             |
| C61-H61...O7   | 2.45 | 2.780(3)                               | 101 | Intra             |
| C71-H71...O5   | 2.41 | 3.299(4)                               | 160 | 1-x,1-y,-z        |
| C74-H74C...O1  | 2.48 | 3.356(4)                               | 152 | 2-x,1-y,1-z       |
|                |      | <b>PAZ<sup>+</sup>•NFA<sup>-</sup></b> |     |                   |
| N5-H3...O4     | 1.75 | 2.6589(1)                              | 173 | -x,1/2+y,1/2-z    |
| N6-H4...O3     | 1.83 | 2.7578(1)                              | 172 | -x,1/2+y,1/2-z    |
| N7-H5A...N2    | 2.10 | 2.9399(1)                              | 163 | 1-x,-1/2+y,1/2-z  |
| N7-H5B...O3    | 1.98 | 2.8646(1)                              | 172 | 1-x,1/2+y,1/2-z   |
| N8-H7...O4     | 1.85 | 2.6423(1)                              | 144 | Intra             |
| C1-H1C...O1    | 2.58 | 3.4797(2)                              | 153 | 1-x,1-y,1-z       |
| C13-H13...O2   | 2.37 | 3.3183(2)                              | 178 | -x,1/2+y,1/2-z    |
| C16-H16...O1   | 2.40 | 2.8261(1)                              | 107 | Intra             |
| C16-H16...N4   | 2.31 | 2.9182(1)                              | 121 | Intra             |
| C20-H20...O3   | 2.56 | 3.2786(1)                              | 132 | -x,1/2+y,1/2-z    |
| C21-H21A...O2  | 2.28 | 2.9854(1)                              | 128 | Intra             |
| C21-H21C...F3  | 2.46 | 3.2506(1)                              | 138 | -1+x,1/2-y,-1/2+z |
| C29-H29...O2   | 2.59 | 3.4396(2)                              | 149 | x,y,z             |
| C33-H33...N9   | 2.34 | 2.9417(1)                              | 120 | Intra             |

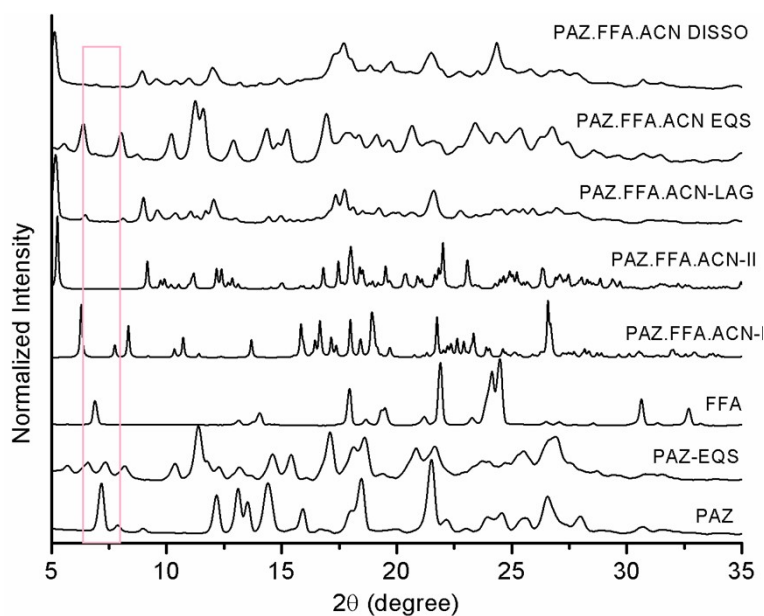

**Fig. S6.** PXR D pattern overlay of pazopanib (PAZ), residual solid of PAZ in pH 1.2 equilibrium solubility medium (PAZ-EQS), flufenamic acid (FFA), PAZ·FFA·ACN-I, PAZ·FFA·ACN-II and acetonitrile drop grinding preparation of PAZ·FFA·ACN-II (PAZ·FFA·ACN-LAG), residual solid in pH 1.2 equilibrium solubility medium of PAZ·FFA·ACN-II (PAZ·FFA·ACN-EQS), and undissolved solid of PAZ·FFA·ACN-II after dissolution experiment under pH 1.2 dissolution medium.

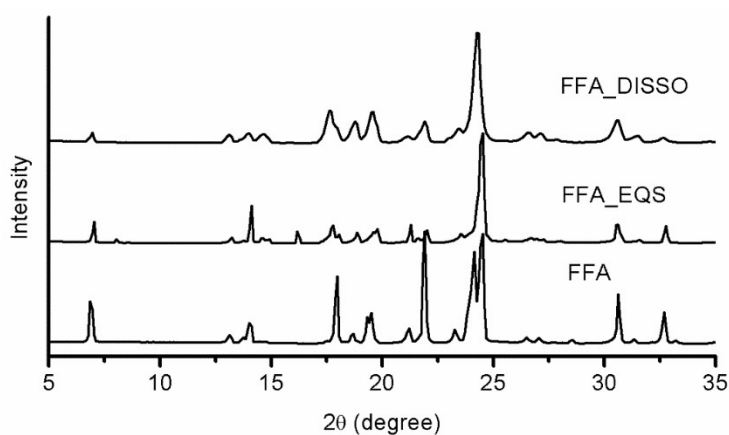

**Fig. S7.** PXR D pattern overlay of FFA, residue in the pH 1.2 equilibrium solubility medium, and left over solid after dissolution experiment under pH 1.2 dissolution medium.

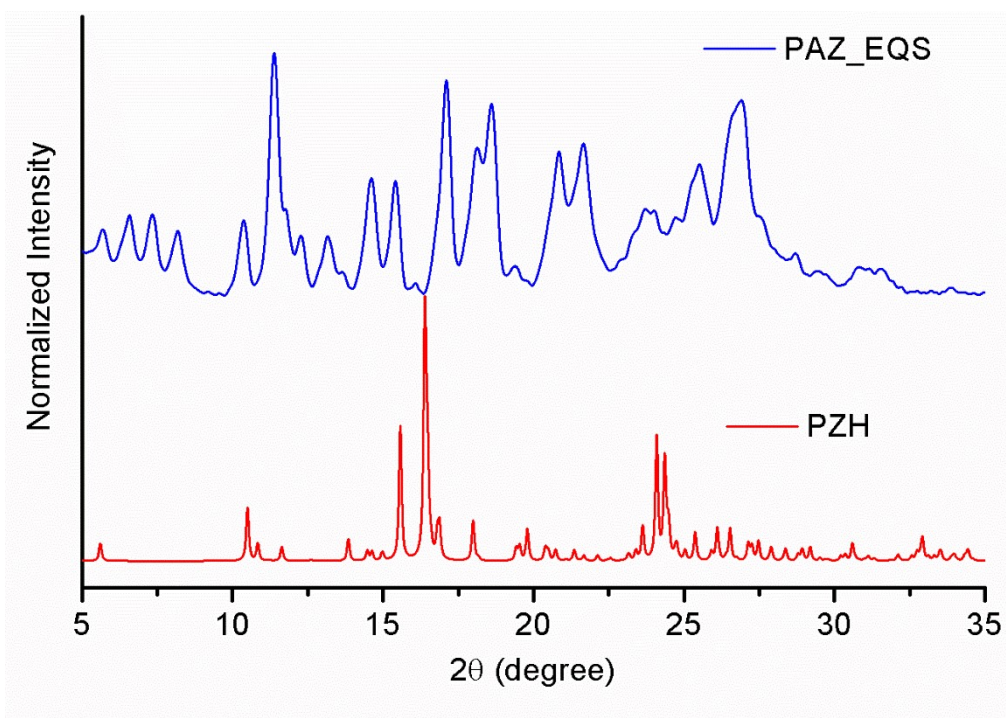

**Fig. S8.** PXRD pattern overlay of pazopanib hydrochloride (PZH) and, residue PAZ in the pH 1.2 equilibrium solubility medium. PXRD pattern of PZH was taken from published data in *Powder Diffr.*, **2021**, 36, 205-207.

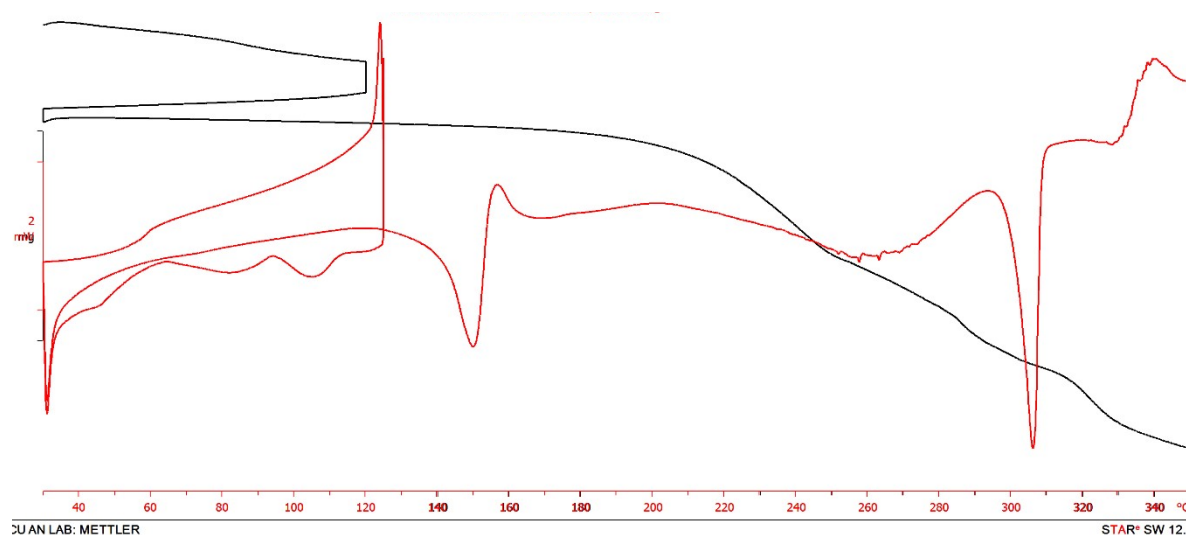

**Fig. S9.** DSC (red line) and TGA (black line) overlay of  $\text{PAZ}^+\cdot\text{FFA}^-\cdot\text{ACN}$  for heat-cool cycles. First heating cycle 30-120°C with heating rate 10°C/min with an isotherm at 120 °C for 15 minutes followed by cooling to 30 °C with heating rate 10°C/min. After an isotherm at 30°C for 15 minutes a second heating cycle 30-350°C with heating rate 10°C/min was performed.

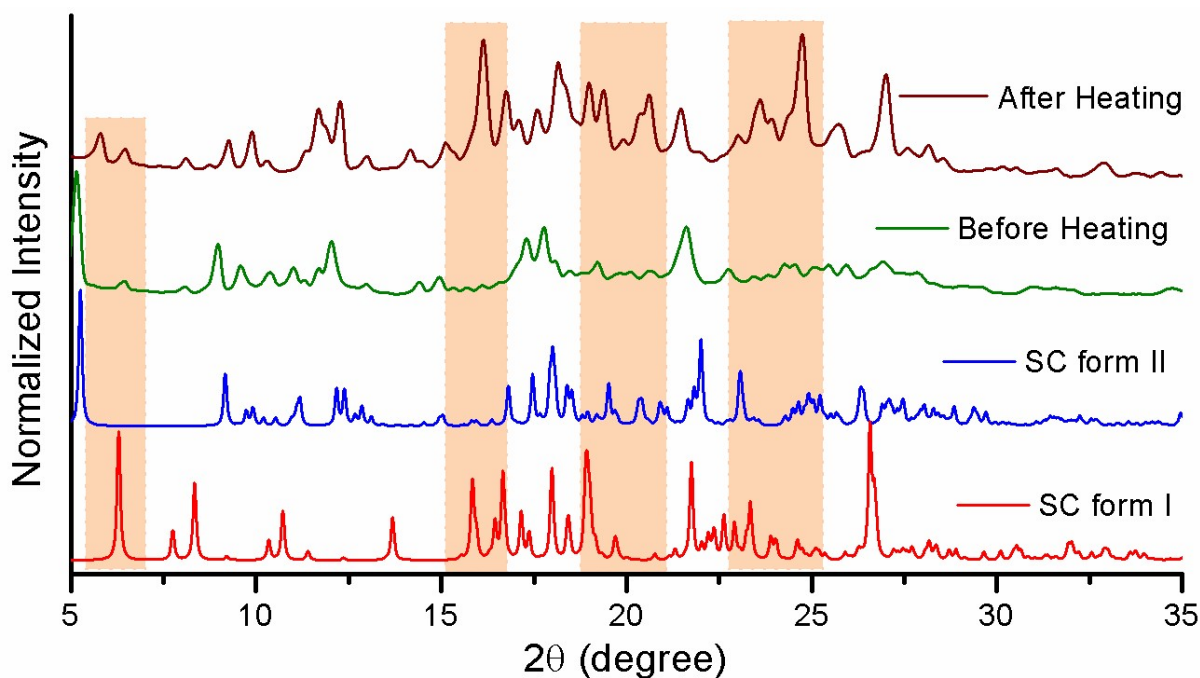

**Fig. S10.** PXRD pattern overlay of PAZ·FFA·ACN-I simulated from SC-XRD (red), PAZ·FFA·ACN-II simulated from SC-XRD (blue), acetonitrile drops grinding preparation of PAZ·FFA·ACN-II (green), and after heating grinding preparation (maroon). The highlighted regions showed a significant difference in diffraction pattern.

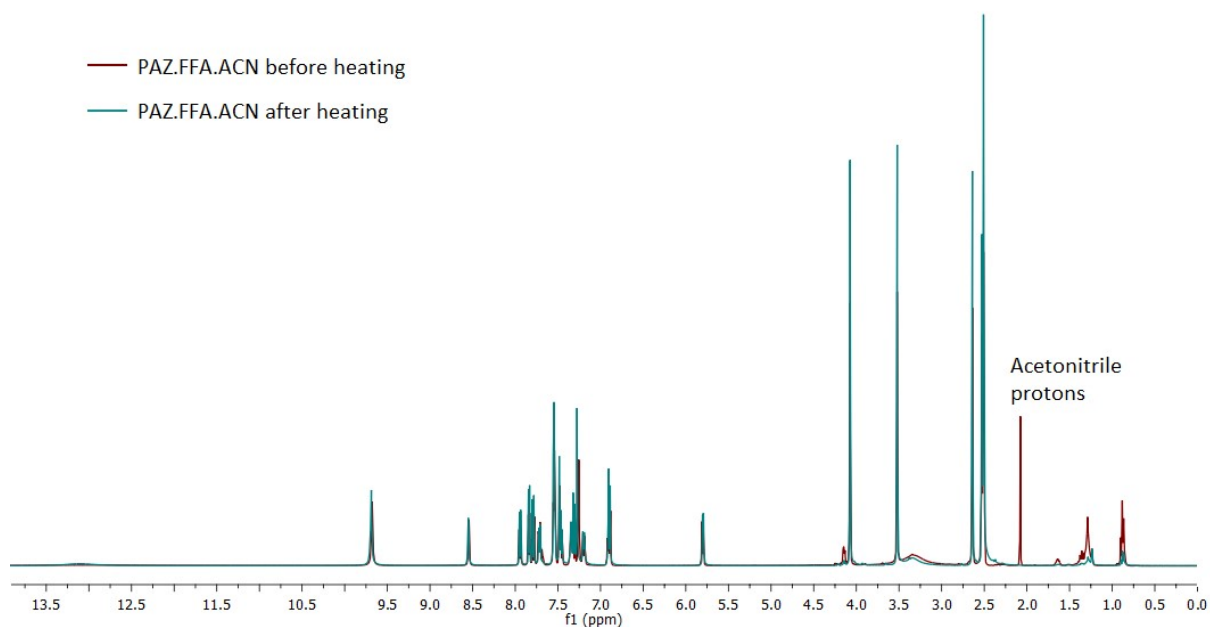

**Fig. S11.** <sup>1</sup>H NMR spectra of acetonitrile drops grinding preparation of PAZ·FFA·ACN sample before and after heating at 120 °C for one hour. Spectra were recorded at 400 MHz in DMSO-*d*<sub>6</sub> solvent.
